# Supplementary material for: Quadratic magnetic gradients from seven- and nine-spacecraft constellations
Source: Copernicus journal article supplement (doi:10.5194/angeo-43-115-2025), 2025-01-30
Supplement: Supplementary file 1 [file angeo-43-115-2025-supplement.zip]

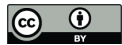

## *Supplement of*

# **Quadratic magnetic gradients from seven- and nine-spacecraft constellations**

**Chao Shen et al.**

*Correspondence to:* Chao Shen (shenchao@hit.edu.cn) and Gang Zeng (gzeng2014@126.com)

- [angeo-43-115-2025-supplement-title-page.pdf](#)
- Supplement
  - code
    - \* ALQG7.m
    - \* ALQG7\_main.m
    - \* DipoleB.m
    - \* DipoleGradients.m
    - \* DipolePlot.m
    - \* Discretization\_error.m
    - \* FluxropeB.m
    - \* FluxropeGradients.m
    - \* FluxropePlot.m
    - \* GetTheoryB.m
    - \* GetTheoryB\_Discretization\_error.m
    - \* GetTheoryGradientsB.m
    - \* MRA.m
    - \* STD.m
    - \* calculateGBk.m
    - \* change\_L.m
    - \* linear\_gradient.m
    - \* nondimensionalization.m
    - \* nondimensionalization\_fluxrope.m
    - \* order.m
    - \* order\_fluxrope.m
    - \* time\_derivative.m
    - \* x.mat

The copyright of individual parts of the supplement might differ from the article licence.
